# Supplementary material for: Crystal structure of Caulobacter crescentus polynucleotide phosphorylase reveals a mechanism of RNA substrate channelling and RNA degradosome assembly
Source: PubMed Central journal article supplement (PMC3376730; doi:10.1098/rsob.120028), 2012-04

Figure S1

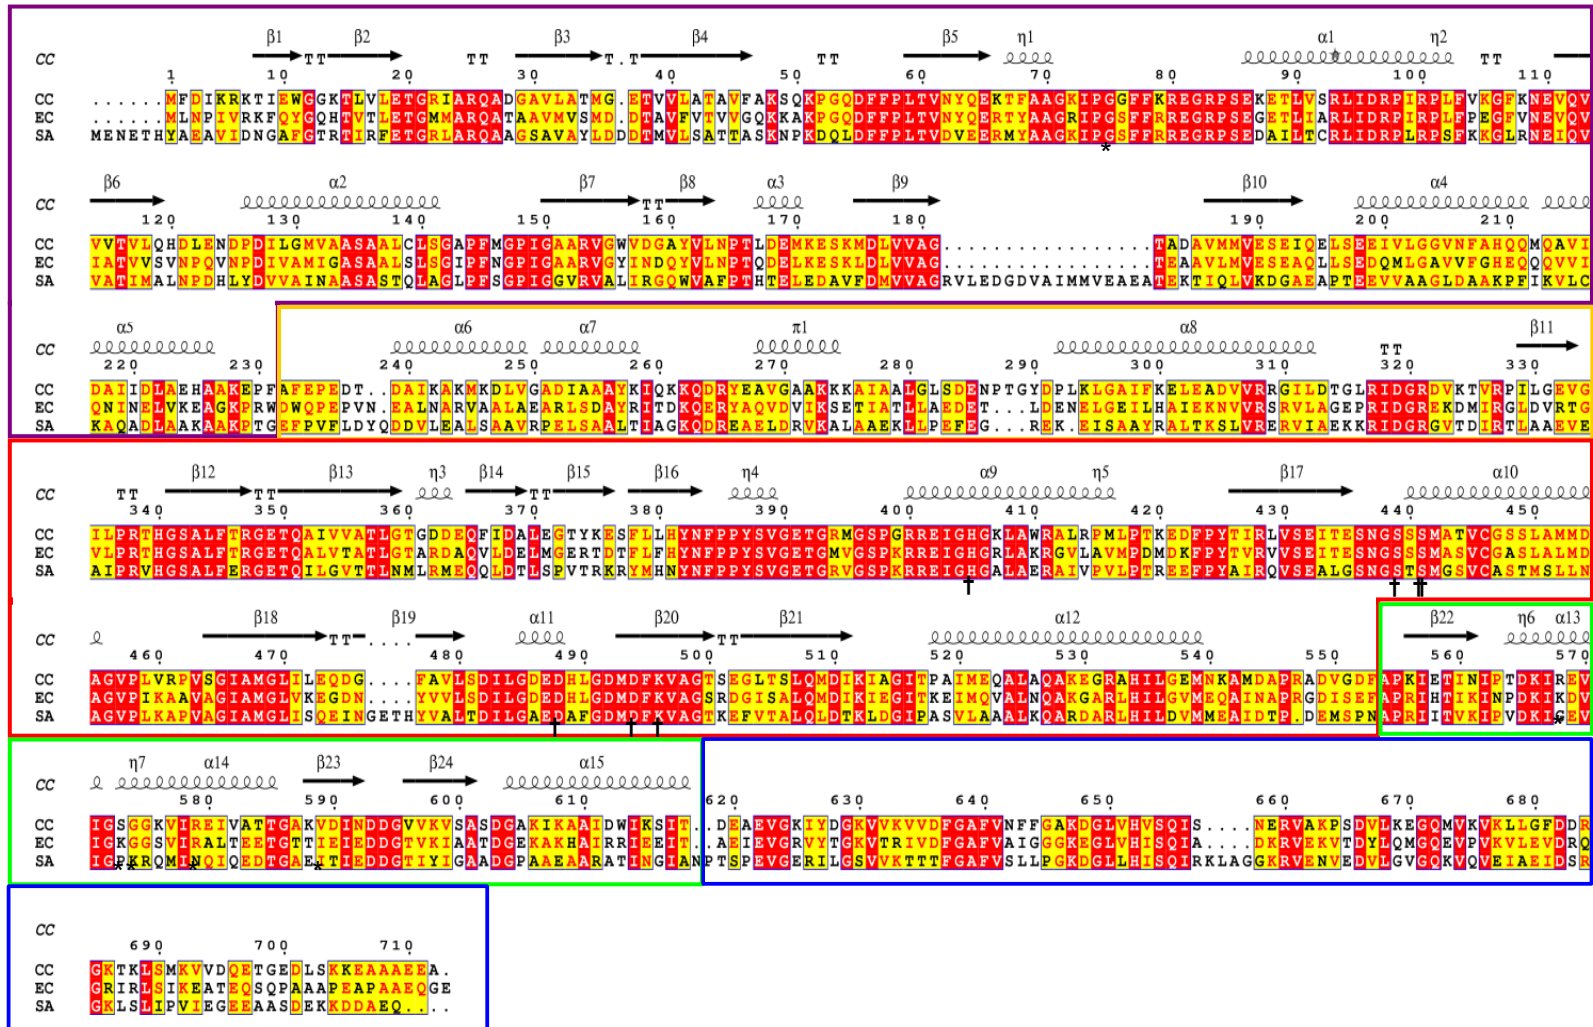

Figure S2

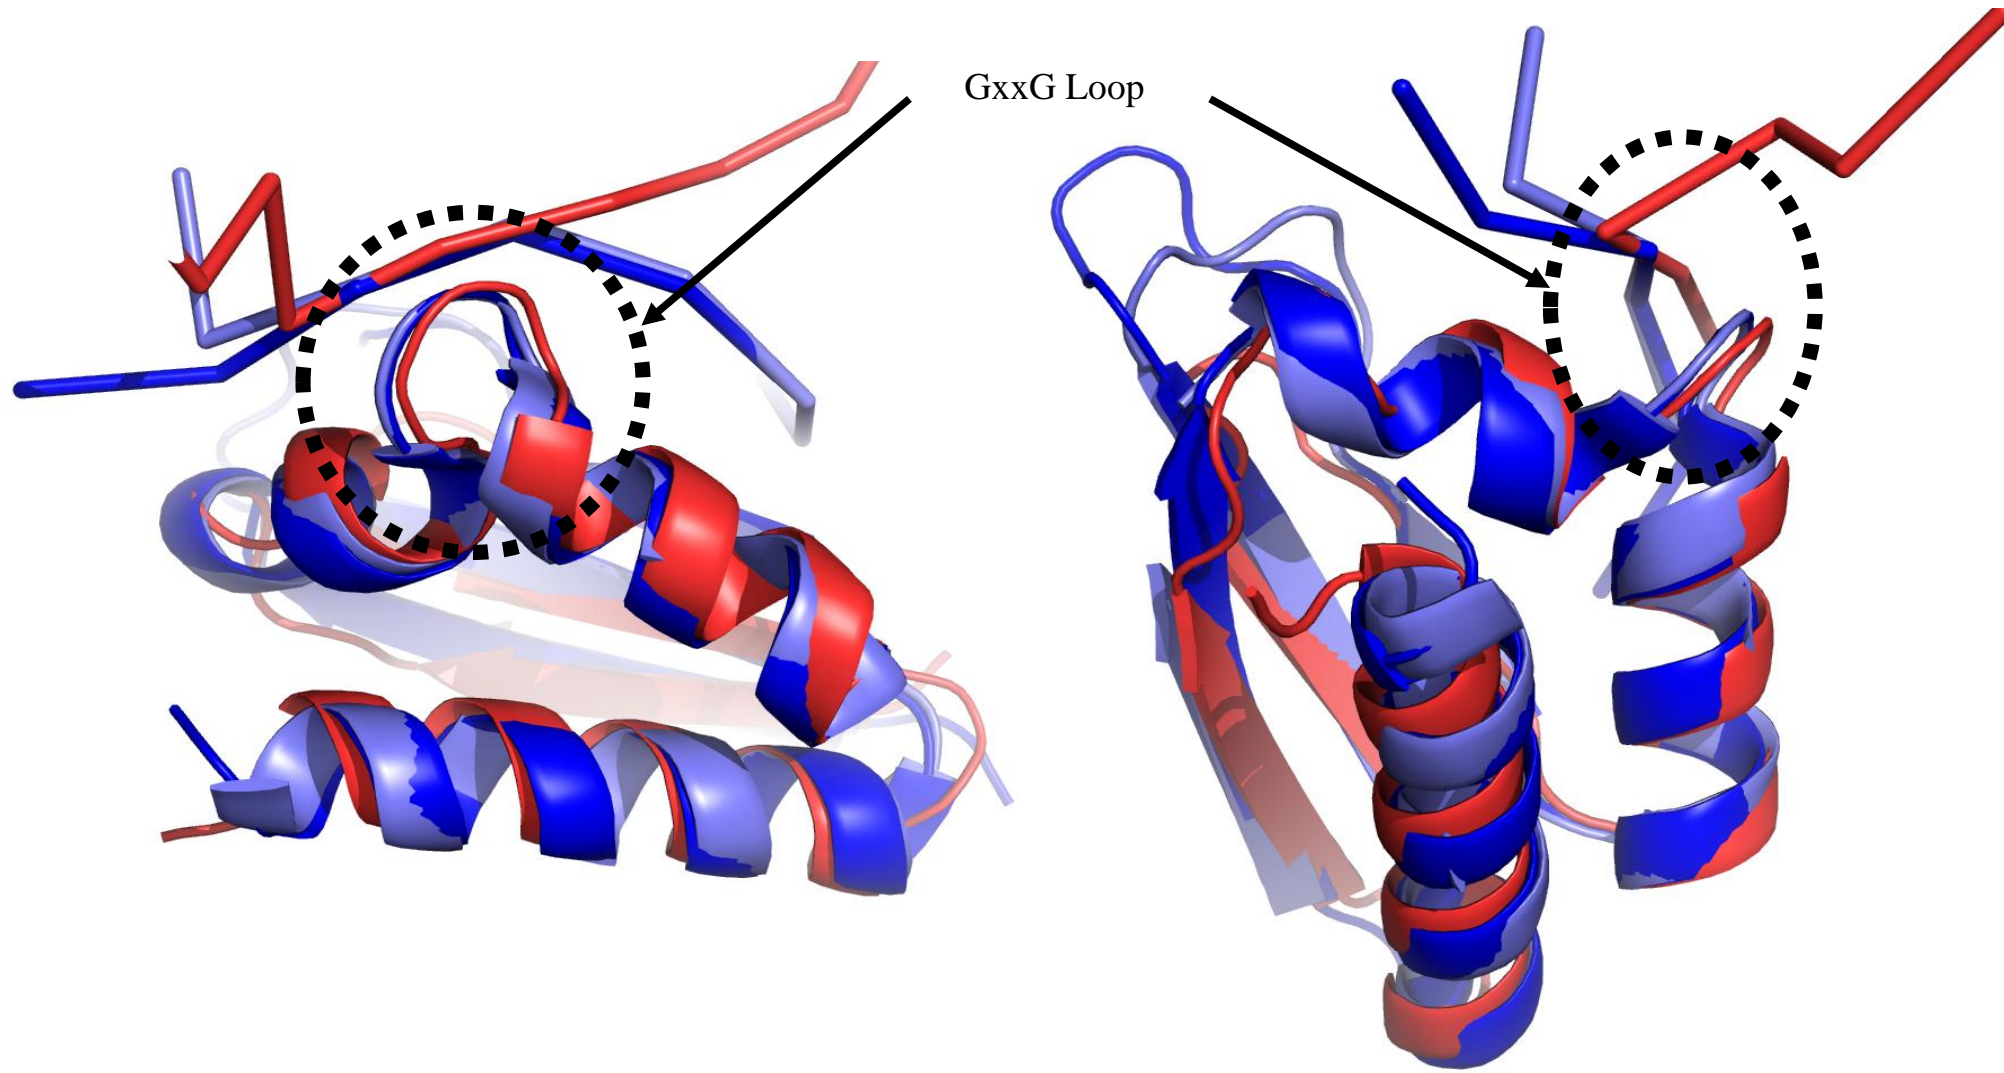

Figure S3

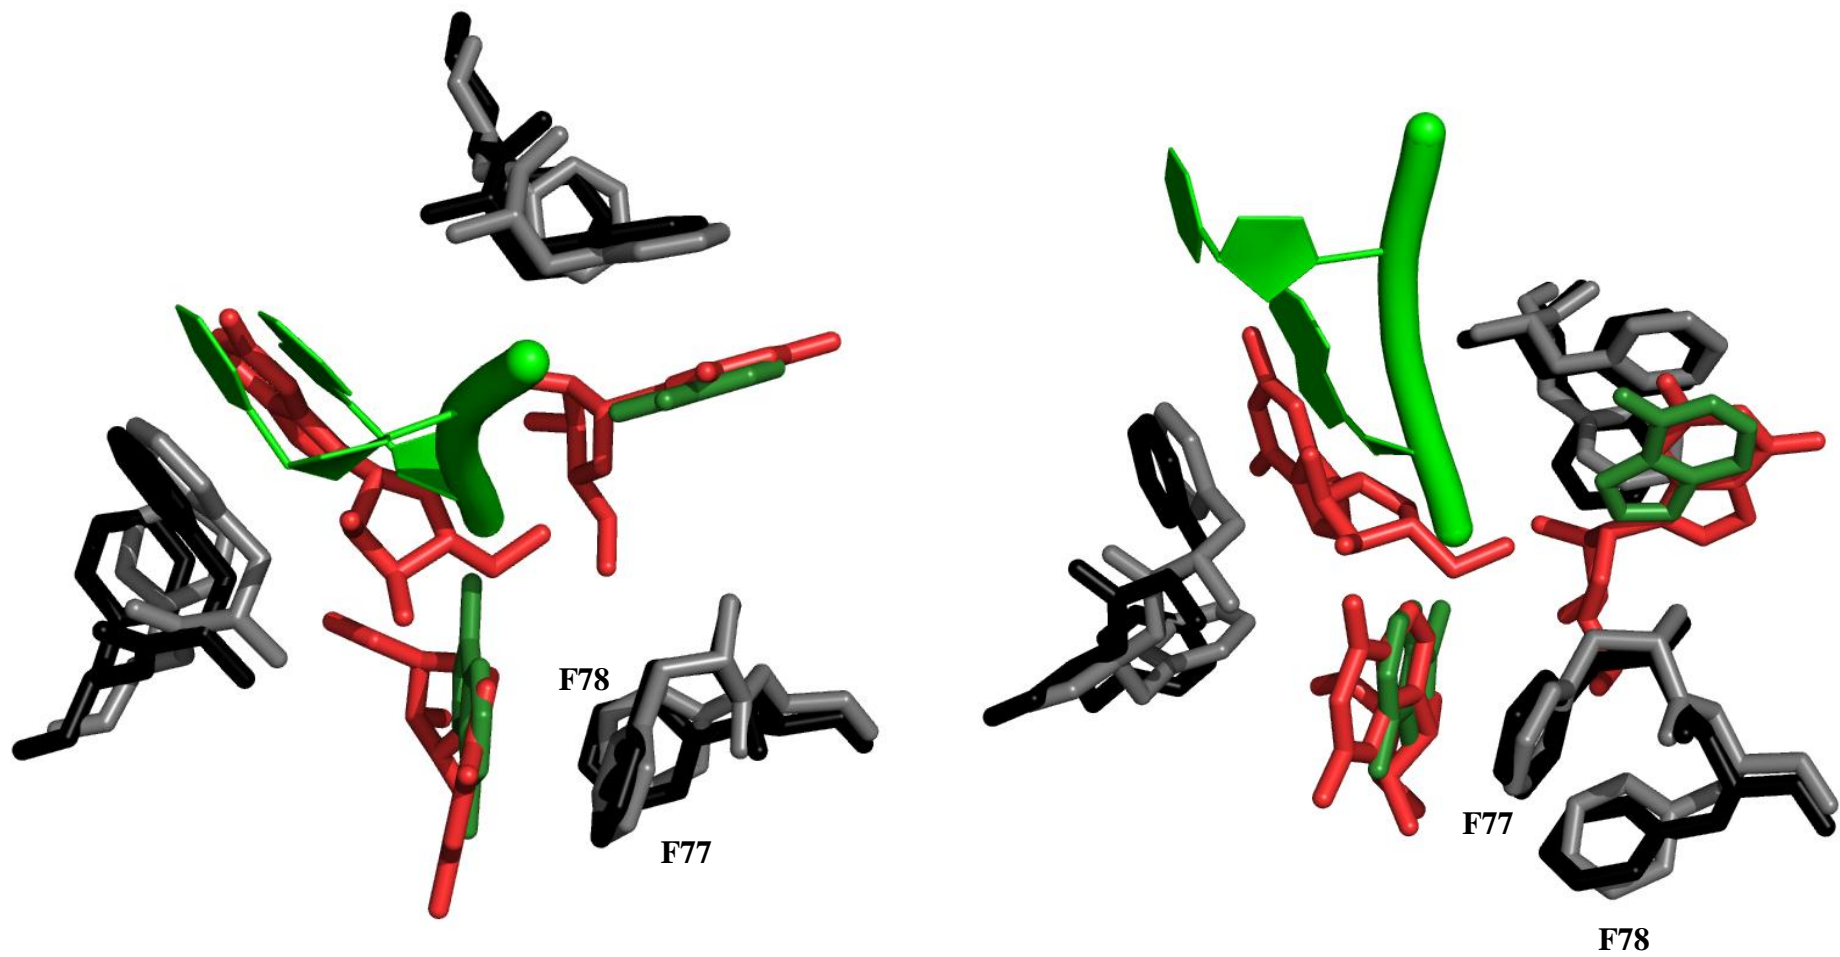



Figure S4

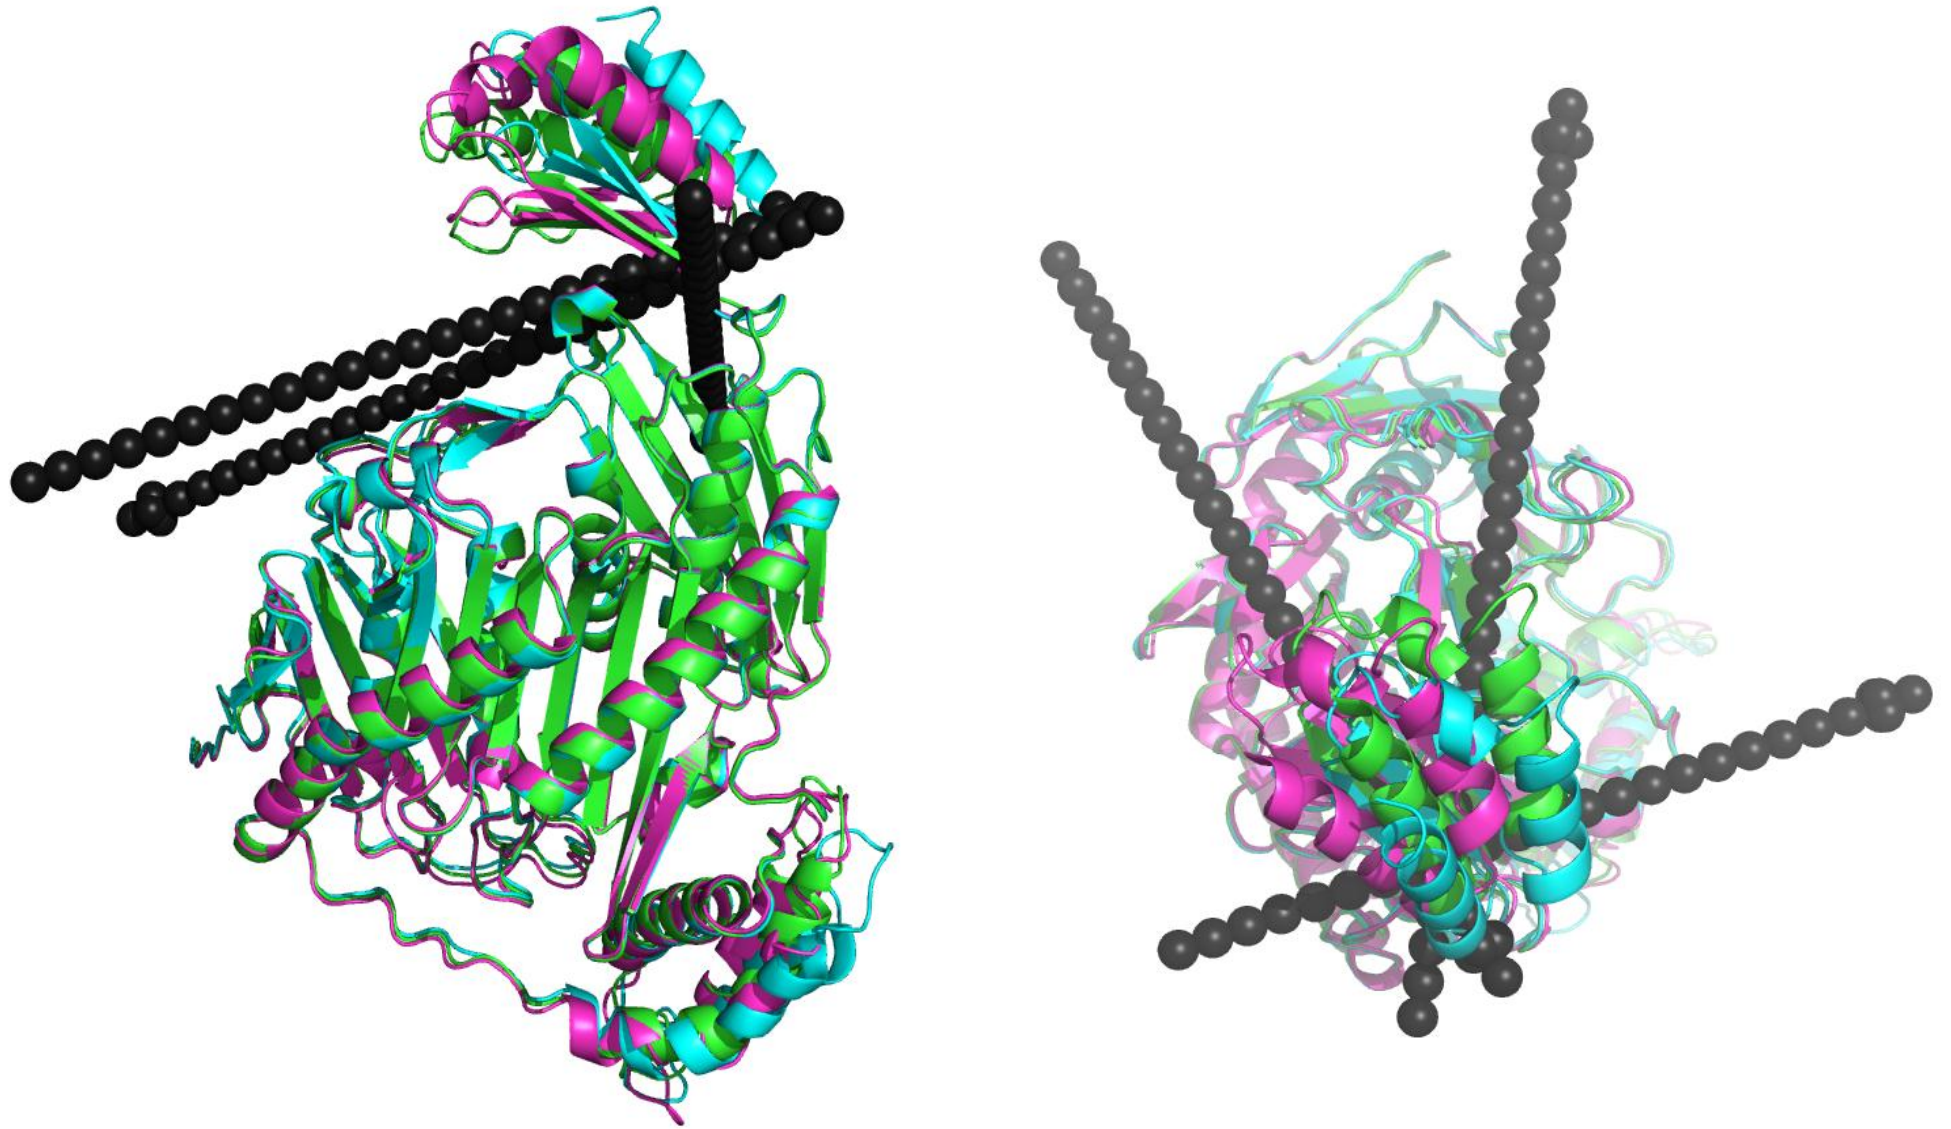

Figure S5

a

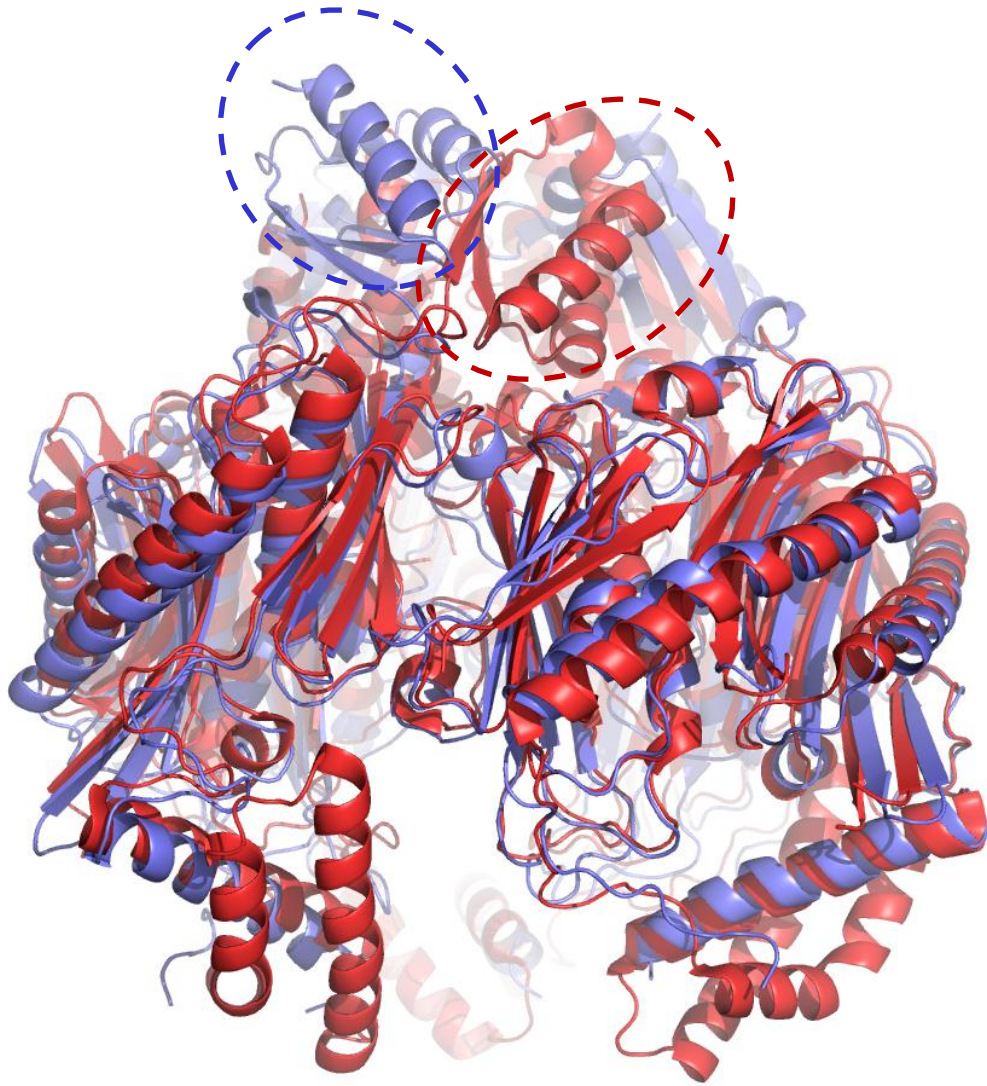

b

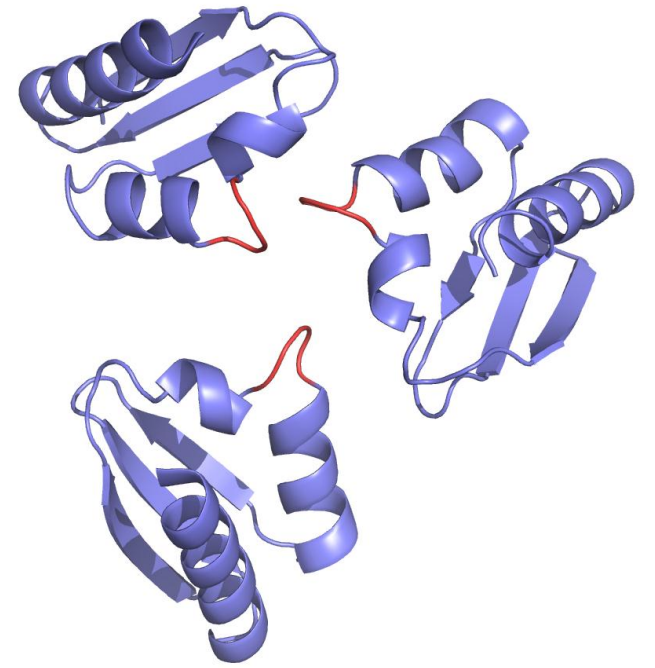

*C. crescentus* RNA-bound KH domains

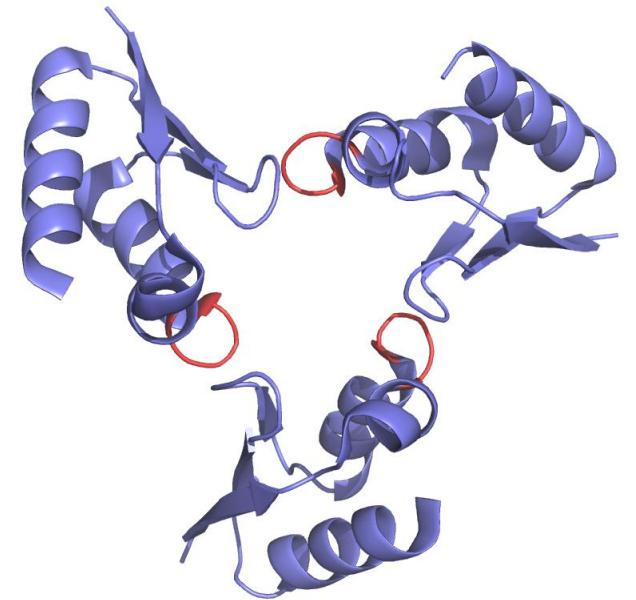

Human apo KH domains



Figure S6

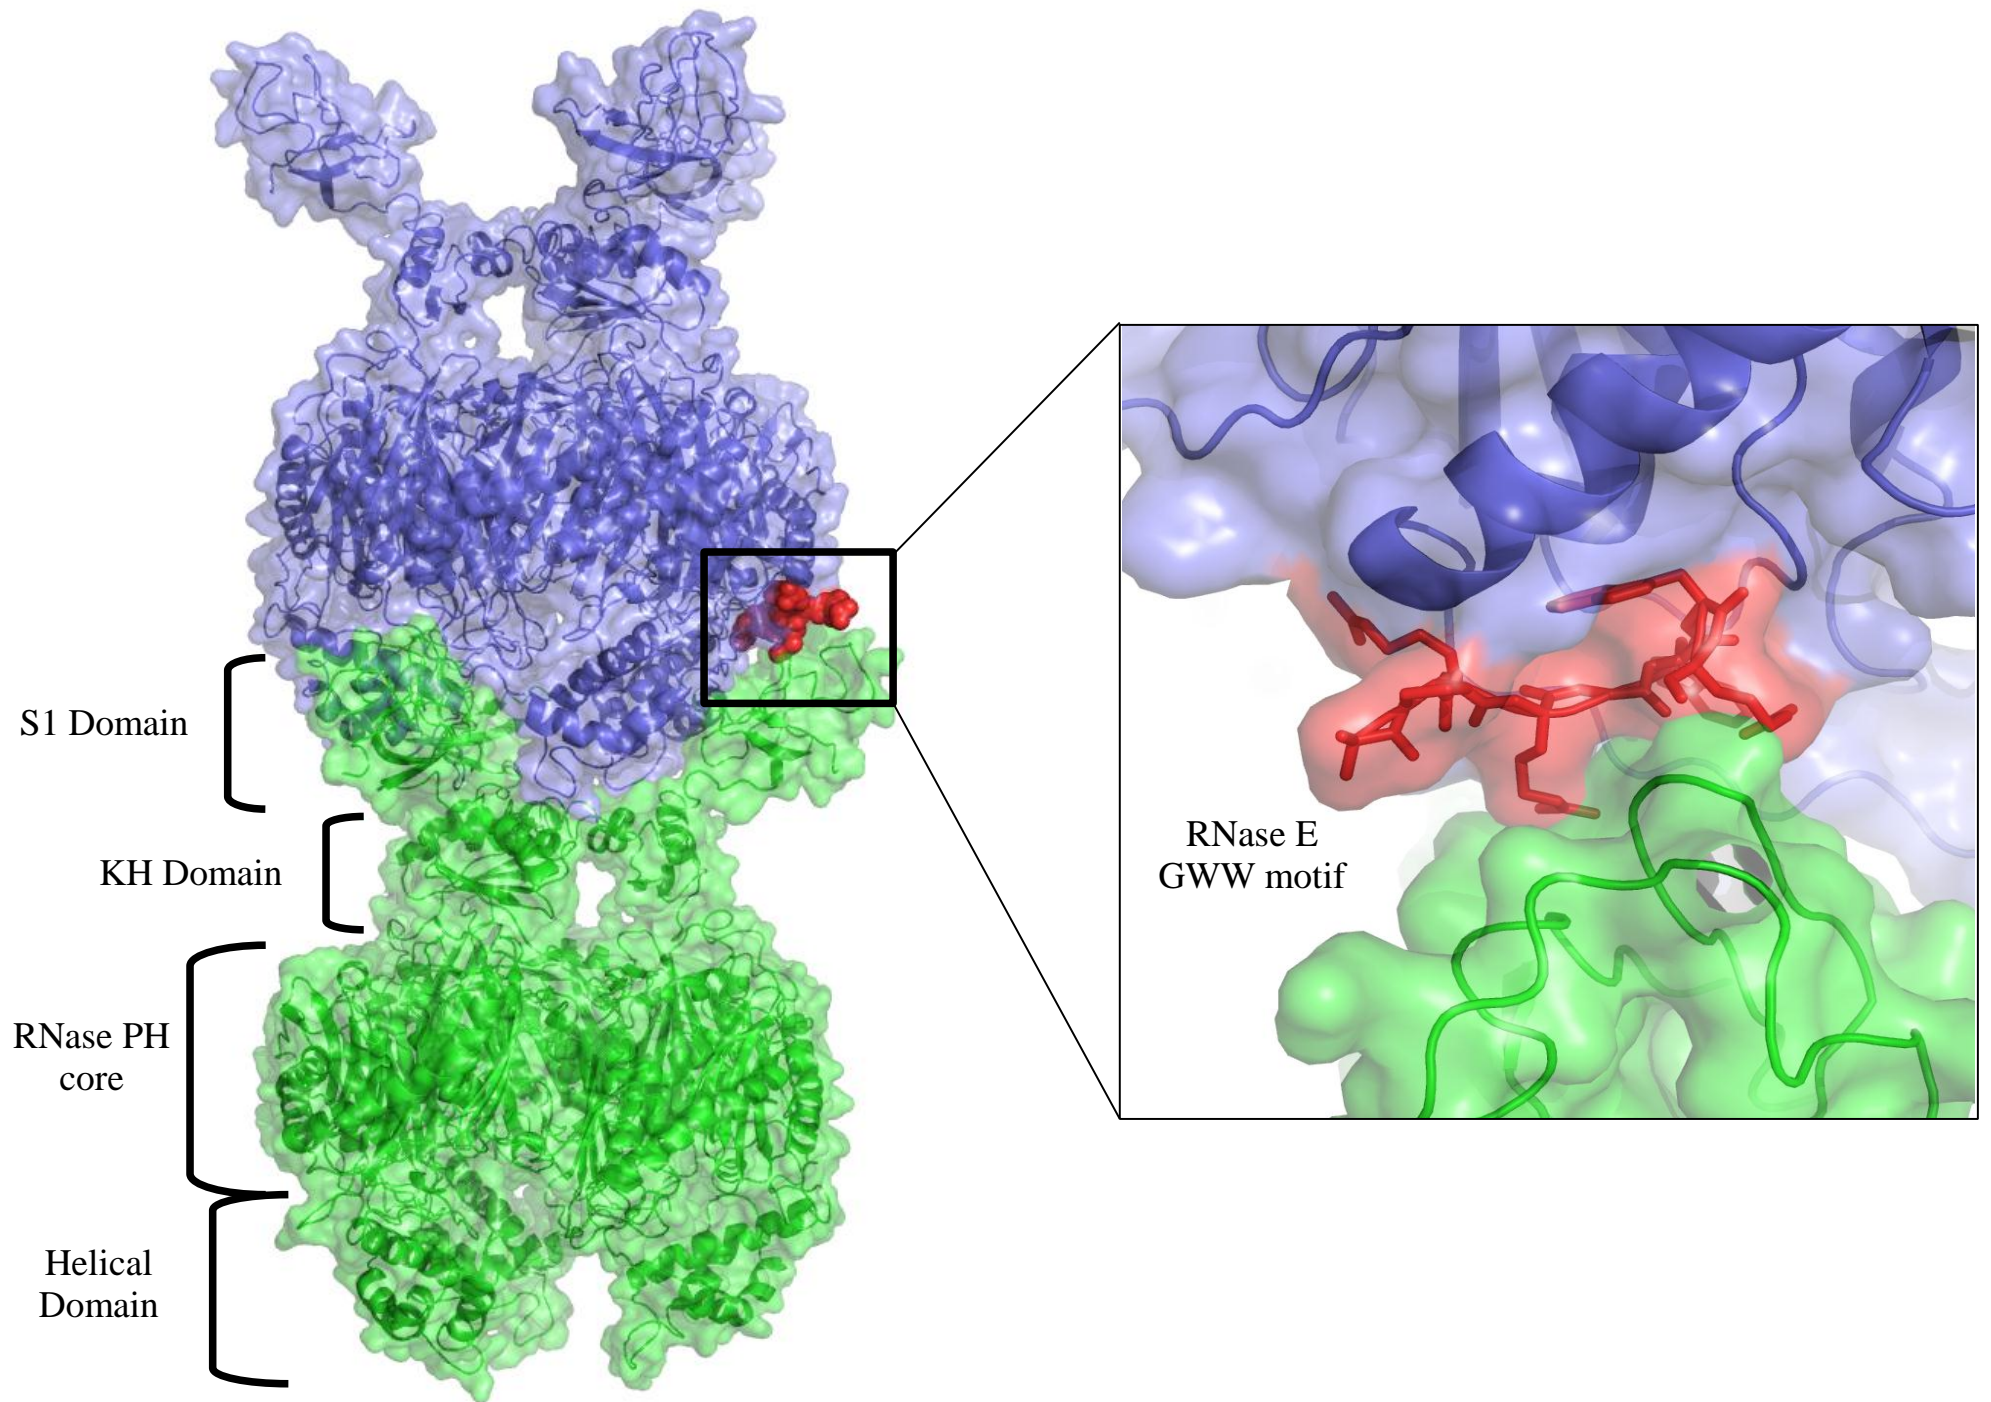

Supplement: rsob120028-s1.pdf [file rsob120028-s1.pdf]
